# Supplementary material
Source: publisher figshare collection journal article supplement (https://karger.figshare.com/ndownloader/files/5498921)
Supplement: Supplementary file 1 [file 5498921]

**Online appendix 1**

**Response sheet for FHCG clinicians**

Date__________

Male or Female: ____________

Job title: ____________

Do you see women who are at moderate risk, high risk or both? _______________

Are you based in a family history clinic, clinical genetics service or other?_________________

How many years have you been working with women at high risk of breast cancer?______________

How long are your typical appointment slots for new patients?_________________

Approximately how many women does your centre see per year who are eligible for chemoprevention?________________

Did you personally recruit for the IBIS studies?__________________

Did your centre recruit for the IBIS studies?___________________

**Response sheet for GPs**

Date__________

Male or Female: ____________

Are you a salaried GP, partner or locum? ________________

What year did you qualify as a GP? ________________

Approximately how many patients are registered with your current practice? ________________

Have you ever referred a woman from your clinic to secondary or tertiary care because of a family history of breast cancer? ________________
